# Supplementary material
Source: PubMed Central journal article supplement (PMC2131703)
Supplement: NIHMS34485-supplement-01.pdf [file NIHMS34485-supplement-01.pdf]

## Peaklist used for CAD on Cystatin

SPECTRUM - MS

#59\_1024\_CAD\_Xtract.raw

FTMS + p NSI Full ms2 1024.45@cid25.00 [621.82-14122.02]

Scan #: 1

RT: 116.69

Data points: 160

| Mass        | Intensity   |
|-------------|-------------|
| 626.821228  | 246.765823  |
| 683.362976  | 324.490295  |
| 756.345825  | 608.746155  |
| 871.373291  | 272.855957  |
| 1001.500366 | 529.361023  |
| 1008.505371 | 276.250824  |
| 1009.014709 | 251.648651  |
| 1043.526245 | 181.194122  |
| 1058.442505 | 621.803223  |
| 1059.691162 | 1352.483887 |
| 1061.443359 | 322.828064  |
| 1069.542969 | 198.654678  |
| 1078.527222 | 345.672363  |
| 1080.36145  | 342.606964  |
| 1081.543335 | 439.615295  |
| 1084.544434 | 213.779419  |
| 1085.538696 | 338.207947  |
| 1087.543091 | 631.589111  |
| 1088.621948 | 175.153595  |
| 1094.234619 | 497.056305  |
| 1097.366821 | 255.288086  |
| 1101.543335 | 822.320679  |
| 1102.751953 | 345.800354  |
| 1109.826416 | 189.635757  |
| 1114.888306 | 536.438538  |
| 1119.738281 | 183.80986   |
| 1120.922729 | 270.477753  |
| 1122.376587 | 1079.546021 |
| 1125.379395 | 380.562378  |
| 1128.567871 | 185.383698  |
| 1133.567017 | 274.010803  |
| 1140.932739 | 381.389618  |
| 1151.58667  | 209.581482  |
| 1154.573364 | 212.486343  |
| 1155.482056 | 339.919159  |

|             |             |
|-------------|-------------|
| 1156.210571 | 353.39917   |
| 1156.940186 | 253.514008  |
| 1192.598145 | 295.618195  |
| 1207.658447 | 210.889175  |
| 1209.60791  | 332.039368  |
| 1223.557495 | 166.298645  |
| 1225.612183 | 194.020279  |
| 1244.117432 | 218.168991  |
| 1316.441528 | 434.839569  |
| 1320.742432 | 1363.124146 |
| 1445.732666 | 139.261429  |
| 1462.76062  | 534.479919  |
| 1480.770874 | 1387.053955 |
| 1483.80603  | 414.904999  |

|             |             |
|-------------|-------------|
| 1547.785767 | 385.913849  |
| 1558.816528 | 272.867493  |
| 1565.860107 | 427.562378  |
| 1575.84375  | 2337.327393 |
| 1593.855103 | 5015.767578 |
| 1738.90918  | 564.349182  |
| 1756.919067 | 1424.15686  |
| 1852.953735 | 531.667053  |
| 1870.96167  | 1250.506348 |
| 1923.987305 | 156.977402  |
| 1941.997559 | 423.123169  |
| 2021.990845 | 379.895844  |
| 2057.027344 | 875.800293  |
| 2177.088379 | 495.315857  |
| 3172.574463 | 560.00061   |
| 3177.574463 | 1782.387817 |
| 3181.580078 | 1118.032471 |
| 3223.088623 | 231.06456   |
| 3316.6521   | 492.296692  |
| 3440.736572 | 207.408615  |
| 3567.786865 | 243.403244  |
| 3680.864746 | 1317.627808 |
| 3906.964355 | 2619.792236 |
| 3947.965576 | 177.573746  |
| 3966.994873 | 229.115219  |
| 4018.013428 | 198.326996  |
| 4146.081543 | 216.10582   |
| 4164.068359 | 350.304016  |

|             |             |
|-------------|-------------|
| 4301.134277 | 359.667023  |
| 4768.39209  | 191.40921   |
| 4786.388672 | 283.911591  |
| 4901.403809 | 299.258545  |
| 6234.05127  | 525.501404  |
| 6345.072754 | 169.368866  |
| 6363.095703 | 951.296448  |
| 6462.162109 | 2723.109863 |
| 6560.199707 | 269.422546  |
| 6577.195801 | 2175.161621 |
| 6707.248535 | 504.507874  |
| 6724.255859 | 4601.110352 |
| 6740.226563 | 172.25415   |
| 6871.333008 | 940.171997  |
| 7429.813477 | 80.992088   |
| 7447.831543 | 84.004707   |
| 7594.905273 | 125.980171  |
| 7820.964355 | 151.159103  |
| 7838.987793 | 297.908478  |
| 7856.993164 | 271.882172  |
| 9417.745117 | 956.711304  |
| 9532.75     | 136.350784  |
| 9877.930664 | 148.081024  |
| 9947.9375   | 71.160042   |
| 10336.16406 | 72.804604   |
| 10353.19824 | 274.599579  |
| 10620.29785 | 130.332397  |
| 10638.30273 | 162.942032  |
| 10753.38672 | 86.028114   |
| 10881.44727 | 85.946373   |
| 10900.44238 | 376.340363  |
| 11604.82324 | 117.835686  |
| 11790.93359 | 338.930878  |
| 11902.97852 | 245.077606  |
| 11919.98145 | 412.264038  |
| 11999.95996 | 130.050812  |
| 12018       | 480.753876  |
| 12035.00586 | 680.351379  |
| 12048.98242 | 141.467896  |
| 12098.04297 | 119.330452  |
| 12114.01563 | 514.845398  |
| 12131.02734 | 1411.181763 |
| 12149.03613 | 2375.741455 |
| 12153.03418 | 211.920761  |
| 12163.06543 | 519.27655   |
| 12227.09668 | 315.656464  |
| 12244.1084  | 855.285522  |
| 12247.10742 | 131.123276  |
| 12262.13086 | 1702.199097 |
| 12268.12598 | 95.688507   |
| 12276.1377  | 344.2883    |
| 12342.14551 | 601.174988  |
| 12359.14844 | 68.183769   |
| 12360.15332 | 2051.268799 |

|             |             |
|-------------|-------------|
| 12366.05762 | 67.900322   |
| 12371.1582  | 163.281845  |
| 12377.16113 | 4297.828613 |
| 12382.16895 | 304.382538  |
| 12391.17676 | 880.963074  |
| 12413.1709  | 366.337158  |
| 12426.15039 | 120.512634  |
| 12431.19531 | 1205.118042 |
| 12442.23438 | 118.141365  |
| 12448.20801 | 2429.655762 |
| 12453.21289 | 254.363632  |
| 12462.24023 | 431.980713  |
| 12510.21094 | 172.978699  |
| 12527.21582 | 563.125488  |
| 12540.23145 | 138.968735  |
| 12545.22852 | 1558.04834  |
| 12563.25586 | 2799.923096 |
| 12576.23535 | 550.233582  |
| 12673.2207  | 78.154678   |
| 12674.26172 | 136.92012   |
| 12690.23633 | 284.384674  |
| 12708.29199 | 734.070862  |
| 12725.3125  | 1558.026978 |
| 12738.31934 | 161.292709  |
| 13047.19531 | 154.907761  |
| 13562.82715 | 241.028488  |
| 14029.03027 | 641.26355   |
| 14046.06934 | 904.211792  |
| 14117.01856 | 189.042603  |

Prosight Output for Original Cystatin SN sequence (CAD)

User Specified Sequence

WSPKEEDRIIPGGIYNADLNDEWVQRALHFAISEYNKATKDDYYRRPLRVLRLARQQTVGGVNYFFDVEVGRTI[-1.007825]C  
TKSQPNLDT[-1.007825]CAFHEQPELQKKQL[-1.007825]CSFEIYVWPENRRSLVKSR[-1.007825]CQES

Number of Amino Acids: 121

Theoretical Mass: 14303.1 Da

Mass Difference: 15.9108 Da

B Ions: 2 Y Ions: 27

| Ion  | Observed Mass (Da) | Theoretical Mass (Da) | Mass Error (Da) | Mass Error (PPM) | Delta M |
|------|--------------------|-----------------------|-----------------|------------------|---------|
| B6   | 756.346            | 756.344               | 0.002           | 2.1              | --      |
| B7   | 871.373            | 871.371               | 0.002           | 2.4              | --      |
| Y29  | 3567.79            | 3567.77               | 0.013           | 3.8              | --      |
| Y30  | 3680.87            | 3680.86               | 0.007           | 2                | --      |
| Y32  | 3906.96            | 3906.95               | 0.012           | 3                | --      |
| Y34  | 4164.07            | 4164.05               | 0.014           | 3.5              | --      |
| Y35  | 4301.13            | 4301.11               | 0.021           | 5                | --      |
| Y53  | 6234.05            | 6234.03               | 0.02            | 3.2              | --      |
| Y54  | 6363.1             | 6363.07               | 0.022           | 3.4              | --      |
| Y55  | 6462.16            | 6462.14               | 0.02            | 3                | --      |
| Y56  | 6577.2             | 6577.17               | 0.026           | 4                | --      |
| Y57  | 6724.26            | 6724.24               | 0.018           | 2.7              | --      |
| Y58  | 6871.33            | 6871.31               | 0.027           | 3.9              | --      |
| Y79  | 9417.75            | 9417.72               | 0.029           | 3.1              | --      |
| Y80  | 9532.75            | 9532.74               | 0.007           | 0.8              | --      |
| Y84  | 9947.94            | 9947.95               | -0.012          | -1.2             | --      |
| Y87  | 10353.2            | 10353.2               | 0.048           | 4.6              | --      |
| Y91  | 10753.4            | 10753.3               | 0.04            | 3.8              | --      |
| Y92  | 10900.4            | 10900.4               | 0.028           | 2.5              | --      |
| Y98  | 11604.8            | 11604.8               | 0               | 0                | --      |
| Y99  | 11790.9            | 11790.9               | 0.031           | 2.7              | --      |
| Y100 | 11920              | 11919.9               | 0.037           | 3.1              | --      |
| Y101 | 12035              | 12035                 | 0.034           | 2.8              | --      |
| Y102 | 12149              | 12149                 | 0.021           | 1.8              | --      |
| Y103 | 12262.1            | 12262.1               | 0.032           | 2.6              | --      |
| Y104 | 12377.2            | 12377.1               | 0.035           | 2.9              | --      |
| Y105 | 12448.2            | 12448.2               | 0.045           | 3.6              | --      |
| Y107 | 12725.3            | 12725.3               | 0.043           | 3.4              | --      |
| Y120 | 14117              | 14117                 | 0.009           | 0.6              | --      |

Crude PScore: 1.24837e-34

McLucky Score: 40.625

Graphic  
al  
Fragme  
nt  
Mapper

W S P K E E D R I I P G G I Y N A D L N D E W V Q R A L H F  
A I S E Y N K A T K D D Y Y R R P L R V L R A R Q Q T V G G  
V N Y F F D V E V G R T I T K S Q P N L D T A F H E Q P  
E L Q K K Q L S F E I Y E V P W E N R R S L V K S R Q E  
S

# Prosight Output for Modified Cystatin SN (CAD)

User Specified Sequence  
 WSPKEEDRIILGGIYNADLNDEWVQRALHFAISEYKATKDDYRRPLRVLRARQQT VGGVNYFFDVEVGRTI[-1.007825]C  
 TKSQPNLDT[-1.007825]CAFHEQPQLKKQL[-1.007825]CSFEIYVWPENRRSLVKSR[-1.007825]CQES  
 Number of Amino Acids: 121  
 Theoretical Mass: 14319.1 Da  
 Mass Difference: -0.12051 Da  
 B Ions: 15 Y Ions: 28

| Ion  | Observed Mass (Da) | Theoretical Mass (Da) | Mass Error (Da) | Mass Error (PPM) | Delta M |
|------|--------------------|-----------------------|-----------------|------------------|---------|
| B6   | 756.346            | 756.344               | 0.002           | 2.1              | --      |
| B7   | 871.373            | 871.371               | 0.002           | 2.4              | --      |
| B13  | 1480.77            | 1480.77               | 0.003           | 2.4              | --      |
| B14  | 1593.86            | 1593.85               | 0.004           | 2.3              | --      |
| B15  | 1756.92            | 1756.92               | 0.004           | 2.4              | --      |
| B16  | 1870.96            | 1870.96               | 0.004           | 2.1              | --      |
| B17  | 1942               | 1942                  | 0.003           | 1.4              | --      |
| B18  | 2057.03            | 2057.02               | 0.006           | 2.7              | --      |
| B41  | 4786.39            | 4786.38               | 0.011           | 2.3              | --      |
| B42  | 4901.4             | 4901.41               | -0.001          | -0.2             | --      |
| B63  | 7447.83            | 7447.81               | 0.017           | 2.3              | --      |
| B64  | 7594.91            | 7594.88               | 0.023           | 3                | --      |
| B66  | 7856.99            | 7856.98               | 0.015           | 1.9              | --      |
| B91  | 10638.3            | 10638.3               | 0.04            | 3.7              | --      |
| B104 | 12247.1            | 12247.1               | 0.035           | 2.8              | --      |
| Y29  | 3567.79            | 3567.77               | 0.013           | 3.8              | --      |
| Y30  | 3680.87            | 3680.86               | 0.007           | 2                | --      |
| Y32  | 3906.96            | 3906.95               | 0.012           | 3                | --      |
| Y34  | 4164.07            | 4164.05               | 0.014           | 3.5              | --      |
| Y35  | 4301.13            | 4301.11               | 0.021           | 5                | --      |
| Y53  | 6234.05            | 6234.03               | 0.02            | 3.2              | --      |
| Y54  | 6363.1             | 6363.07               | 0.022           | 3.4              | --      |
| Y55  | 6462.16            | 6462.14               | 0.02            | 3                | --      |
| Y56  | 6577.2             | 6577.17               | 0.026           | 4                | --      |
| Y57  | 6724.26            | 6724.24               | 0.018           | 2.7              | --      |
| Y58  | 6871.33            | 6871.31               | 0.027           | 3.9              | --      |
| Y79  | 9417.75            | 9417.72               | 0.029           | 3.1              | --      |
| Y80  | 9532.75            | 9532.74               | 0.007           | 0.8              | --      |
| Y84  | 9947.94            | 9947.95               | -0.012          | -1.2             | --      |
| Y87  | 10353.2            | 10353.2               | 0.048           | 4.6              | --      |
| Y91  | 10753.4            | 10753.3               | 0.04            | 3.8              | --      |
| Y92  | 10900.4            | 10900.4               | 0.028           | 2.5              | --      |
| Y98  | 11604.8            | 11604.8               | 0               | 0                | --      |
|      |                    |                       |                 |                  |         |
| Y99  | 11790.9            | 11790.9               | 0.031           | 2.7              | --      |
| Y100 | 11920              | 11919.9               | 0.037           | 3.1              | --      |
| Y101 | 12035              | 12035                 | 0.034           | 2.8              | --      |
| Y102 | 12149              | 12149                 | 0.021           | 1.8              | --      |
| Y103 | 12262.1            | 12262.1               | 0.032           | 2.6              | --      |
| Y104 | 12377.2            | 12377.1               | 0.035           | 2.9              | --      |
| Y105 | 12448.2            | 12448.2               | 0.045           | 3.6              | --      |
| Y107 | 12725.3            | 12725.3               | 0.043           | 3.4              | --      |
| Y115 | 13562.8            | 13562.8               | 0.051           | 3.8              | --      |
| Y119 | 14046.1            | 14046                 | 0.06            | 4.3              | --      |

Crude PScore: 1.01078e-57  
 McLuckey Score: 63.75

## Graphical Fragment Mapper

W S P K E E D R I I L G G I Y N A D L N D E W V Q R A L H F  
 A I S E Y N K A T K D D Y Y R R P L R V L R A R Q Q T V G G  
 V N Y F F D V E V G R T I T K S Q P N L D T C A F H E Q I P  
 E L Q K K Q L C S F E I Y E V P W E N R R S L V K S R C Q E  
 S

SPECTRUM - MS

#59\_1024\_ECD\_1200MSC\_Xtract.raw

FTMS + p NSI Full ms2 1024.45@cid0.00 ecd@5.00 [382.19-15658.13]

Scan #: 1

RT: 318.92

Data points: 345

| Mass       | Intensity  |
|------------|------------|
| 387.191698 | 119.64193  |
| 408.592333 | 20.565166  |
| 477.54503  | 19.912844  |
| 481.780504 | 18.955458  |
| 484.140764 | 20.843714  |
| 487.814806 | 20.516405  |
| 489.257463 | 21.53627   |
| 512.89403  | 20.545259  |
| 515.286974 | 290.610718 |
| 534.293322 | 19.703785  |
| 536.384996 | 20.343197  |
| 594.31859  | 21.21764   |
| 610.849474 | 26.2721    |
| 625.311266 | 22.277037  |
| 633.108019 | 19.000952  |
| 644.33037  | 497.227539 |
| 665.626512 | 21.329721  |
| 693.277574 | 37.205589  |
| 704.256517 | 20.803867  |
| 773.379568 | 512.764771 |
| 779.195737 | 23.920237  |
| 836.916979 | 37.759571  |
| 847.973728 | 10.578156  |
| 853.017443 | 26.929956  |
| 856.722521 | 21.347658  |
| 874.861545 | 11.796202  |
| 888.402147 | 414.284485 |
| 929.95952  | 36.14819   |
| 939.706713 | 22.13542   |
| 949.12755  | 23.613382  |
| 951.567919 | 30.187183  |
| 970.504869 | 46.4767    |
| 993.463949 | 8.890681   |

|             |            |
|-------------|------------|
| 995.011705  | 26.653376  |
| 996.262499  | 47.478676  |
| 1009.434801 | 22.210598  |
| 1020.867723 | 38.048206  |
| 1021.421068 | 58.680645  |
| 1023.520677 | 304.804565 |
| 1033.52849  | 53.558735  |
| 1035.266405 | 31.30945   |
| 1044.50493  | 179.717407 |
| 1063.543552 | 12.264289  |
| 1065.437181 | 26.576084  |
| 1084.689212 | 91.248161  |
| 1097.632738 | 24.285799  |
| 1099.898363 | 60.267097  |
| 1119.544969 | 48.707024  |
| 1121.566332 | 42.951939  |
| 1125.569139 | 31.453875  |
| 1139.571215 | 46.579914  |
| 1144.578295 | 26.972485  |
| 1157.590013 | 177.707458 |
| 1176.282762 | 26.781864  |
| 1181.577806 | 69.212456  |
| 1183.009691 | 29.692621  |
| 1185.525043 | 78.528595  |
| 1190.47368  | 117.325554 |
| 1192.10222  | 32.067318  |
| 1192.849413 | 31.704742  |
| 1193.596117 | 63.603333  |
| 1206.982714 | 31.47731   |
| 1226.468431 | 28.505878  |
| 1231.616869 | 34.426788  |
| 1238.62517  | 32.734966  |
| 1243.11577  | 24.528168  |
| 1243.802904 | 40.296551  |
| 1247.009691 | 25.719482  |
| 1261.636522 | 23.99427   |
| 1263.9489   | 24.270161  |

|             |            |
|-------------|------------|
| 1266.220507 | 24.025057  |
| 1266.884447 | 31.076925  |
| 1270.676927 | 148.62088  |
| 1272.272386 | 36.432457  |
| 1286.831713 | 33.333881  |
| 1290.692016 | 130.669373 |
| 1292.64934  | 118.093834 |
| 1295.289598 | 49.099754  |
| 1303.653951 | 9.637797   |



|             |           |
|-------------|-----------|
| 1304.697679 | 42.3591   |
| 1336.558519 | 27.861082 |
| 1339.151537 | 36.45018  |
| 1340.675951 | 73.543396 |
| 1344.689257 | 26.404844 |
| 1351.682665 | 30.10614  |
| 1352.248094 | 38.272694 |
| 1355.676439 | 48.54071  |
| 1357.684618 | 69.798004 |
| 1360.79326  | 29.694845 |
| 1361.685106 | 67.807846 |

|             |            |
|-------------|------------|
| 1365.332567 | 26.686863  |
| 1370.149584 | 35.806301  |
| 1370.683153 | 78.294365  |
| 1373.6989   | 43.691719  |
| 1376.688036 | 67.893257  |
| 1378.028978 | 32.876175  |
| 1378.692064 | 54.594704  |
| 1383.758715 | 257.752716 |
| 1386.815111 | 26.511875  |
| 1387.568024 | 89.352409  |
| 1393.70476  | 27.329285  |
| 1400.699633 | 69.023232  |
| 1408.204793 | 55.414909  |
| 1409.710741 | 49.529606  |
| 1414.206224 | 37.600948  |
| 1414.714159 | 60.599789  |
| 1416.723558 | 98.185097  |
| 1418.214037 | 29.327572  |
| 1419.908983 | 43.549683  |
| 1420.846322 | 117.972649 |
| 1422.304098 | 11.130554  |
| 1423.680834 | 56.019783  |
| 1428.685839 | 41.494698  |
| 1430.683397 | 65.191551  |
| 1432.761814 | 15.908261  |
| 1433.429735 | 26.597467  |
| 1434.756931 | 12.933965  |
| 1435.271776 | 25.729767  |
| 1438.164476 | 28.327839  |
| 1440.777805 | 596.041504 |
| 1446.301561 | 42.053444  |
| 1452.315111 | 34.861118  |
| 1472.753588 | 84.927933  |
| 1475.225145 | 32.969635  |
| 1476.968798 | 206.173843 |
| 1478.064379 | 100.683151 |
| 1478.727709 | 240.147415 |

|             |            |
|-------------|------------|
| 1483.719652 | 30.564003  |
| 1493.750048 | 45.457741  |
| 1497.744513 | 264.297485 |
| 1499.748461 | 33.98037   |
| 1505.779344 | 50.463303  |
| 1510.023702 | 9.361143   |
| 1512.808567 | 25.619593  |

|             |            |
|-------------|------------|
| 1514.762377 | 70.380348  |
| 1524.176317 | 32.383572  |
| 1527.340502 | 29.380081  |
| 1539.742357 | 29.30908   |
| 1549.75571  | 13.047528  |
| 1552.753099 | 37.552032  |
| 1555.269091 | 35.146305  |
| 1557.297411 | 191.061066 |
| 1561.961718 | 36.950417  |
| 1564.80913  | 37.839317  |
| 1566.03142  | 28.984997  |
| 1571.460741 | 89.58828   |
| 1576.036425 | 76.63781   |
| 1577.916307 | 42.554943  |
| 1583.03142  | 88.029099  |
| 1584.760057 | 41.469593  |
| 1587.138597 | 112.039192 |
| 1588.027513 | 77.793732  |
| 1589.777391 | 63.562107  |
| 1596.811327 | 42.029221  |
| 1599.808763 | 35.435818  |
| 1603.801683 | 32.694988  |
| 1606.415453 | 32.347576  |
| 1609.448324 | 11.573897  |
| 1610.889818 | 160.558502 |
| 1619.813036 | 27.700544  |
| 1624.807176 | 69.59407   |
| 1635.140428 | 29.358438  |
| 1645.798387 | 93.184624  |
| 1662.836962 | 27.49559   |
| 1665.022115 | 9.123872   |
| 1673.81682  | 36.143154  |
| 1674.84116  | 24.767643  |
| 1680.858202 | 47.361282  |
| 1689.854662 | 44.197639  |
| 1710.865526 | 73.011246  |
| 1714.5833   | 34.011982  |
| 1734.875658 | 45.282375  |
| 1745.621874 | 38.461163  |
| 1747.23369  | 46.155624  |
| 1747.858202 | 63.32299   |

|             |            |
|-------------|------------|
| 1751.097216 | 51.802067  |
| 1756.974413 | 34.476719  |
| 1758.843676 | 63.753815  |
| 1772.799242 | 39.519058  |
| 1773.949802 | 386.539825 |
| 1776.111864 | 61.488644  |
| 1776.61516  | 67.736443  |
| 1777.51494  | 38.44228   |
| 1780.091967 | 47.882057  |
| 1795.242723 | 32.833569  |
| 1824.514818 | 50.144325  |
| 1887.993625 | 158.849701 |
| 1959.031711 | 160.470825 |
| 2040.003879 | 197.551865 |
| 2057.046726 | 39.542278  |
| 2075.061863 | 67.336319  |
| 2187.144382 | 165.926453 |
| 2271.144871 | 19.646784  |
| 2301.190281 | 109.509865 |
| 2348.147312 | 21.157408  |
| 2399.195652 | 65.612427  |
| 2416.212742 | 282.993225 |
| 2441.226658 | 23.450983  |
| 2450.223484 | 26.703411  |
| 2503.256443 | 47.357231  |
| 2545.262546 | 148.520676 |
| 2705.363132 | 19.908833  |
| 2736.310642 | 136.643448 |
| 2841.433201 | 47.30463   |
| 2853.447605 | 58.438885  |
| 2921.283054 | 32.715549  |
| 2953.415623 | 27.31439   |
| 2963.500828 | 30.225533  |
| 3139.152683 | 19.073656  |
| 3151.802585 | 36.025593  |
| 3154.510349 | 51.844482  |
| 3265.649265 | 21.857277  |
| 3296.618015 | 76.829903  |
| 3298.747898 | 55.934109  |
| 3313.639988 | 27.658859  |
| 3324.332662 | 15.527793  |
| 3372.676609 | 61.309628  |
| 3424.712039 | 29.123997  |
| 3435.776462 | 257.570801 |
| 3551.683445 | 83.407654  |
| 3556.039083 | 36.855743  |
| 3574.711092 | 25.428295  |
| 3581.820955 | 29.369934  |
| 3585.806539 | 33.190994  |
| 3665.864279 | 196.904449 |
| 3766.950886 | 25.060026  |
| 3773.346102 | 56.234303  |
| 3774.916188 | 22.039635  |
| 3792.896198 | 44.376251  |

|             |            |
|-------------|------------|
| 3794.901998 | 340.842621 |
| 3811.027882 | 21.132072  |
| 3837.346516 | 24.898308  |
| 3851.906178 | 14.889924  |
| 3853.985738 | 40.819366  |
| 3984.027698 | 31.054895  |
| 4019.033346 | 181.686554 |
| 4081.501393 | 16.117352  |
| 4128.062261 | 17.503517  |
| 4129.072408 | 106.539742 |
| 4146.084079 | 525.061096 |
| 4150.086691 | 131.858429 |
| 4163.013433 | 9.661422   |
| 4190.350207 | 18.633755  |
| 4260.144001 | 154.681717 |
| 4278.665548 | 65.312805  |
| 4388.220405 | 70.540543  |
| 4389.210866 | 35.136604  |
| 4401.210651 | 15.633807  |
| 4460.275778 | 248.101257 |
| 4460.777058 | 71.241928  |
| 4503.216511 | 51.265549  |
| 4543.317707 | 22.934046  |
| 4560.364156 | 145.816742 |
| 4670.36156  | 24.532209  |
| 4688.416403 | 303.655365 |
| 4702.366628 | 44.317661  |
| 4703.394781 | 59.841328  |
| 4720.457233 | 27.382715  |
| 4729.406027 | 43.454666  |
| 4734.051475 | 18.511452  |
| 4736.368429 | 58.332859  |
| 4743.39858  | 112.278702 |
| 4749.083942 | 68.836296  |
| 4751.433981 | 65.98661   |
| 4758.737584 | 99.639336  |
| 4759.416694 | 294.622772 |
| 4786.399116 | 130.412842 |
| 4803.414694 | 517.91449  |
| 4818.405952 | 55.027924  |
| 4918.483234 | 16.950758  |
| 4919.472358 | 72.875946  |
| 5031.996174 | 14.160384  |
| 5243.586628 | 24.841581  |
| 5290.43775  | 12.08982   |
| 5316.918171 | 20.561703  |
| 5382.66729  | 27.394575  |
| 5383.67019  | 28.836582  |
| 5400.68769  | 212.106537 |
| 5415.690879 | 16.721357  |
| 5489.649768 | 31.075508  |
| 5653.864707 | 25.4776    |
| 5692.892051 | 56.690769  |
| 5693.646838 | 19.147976  |

|             |            |
|-------------|------------|
| 5766.921348 | 29.573593  |
| 5805.818609 | 83.603889  |
| 5923.033089 | 25.196442  |
| 6022.107505 | 29.10005   |
| 6219.070622 | 120.468849 |
| 6348.098454 | 250.047058 |
| 6448.18485  | 25.844187  |
| 6517.428521 | 17.047813  |
| 6518.431421 | 11.535551  |
| 6562.2132   | 105.182922 |
| 6645.454095 | 12.762131  |
| 6709.283024 | 265.82251  |
| 6774.550209 | 33.191628  |
| 6856.364626 | 134.245316 |
| 7019.39501  | 377.905762 |
| 7083.424137 | 18.612627  |
| 7133.44042  | 585.259583 |
| 7172.766384 | 15.305471  |
| 7187.762995 | 110.05352  |
| 7281.351797 | 8.582774   |
| 7289.622897 | 29.288012  |
| 7301.828773 | 40.40099   |
| 7546.685659 | 125.757607 |
| 7611.952844 | 17.100536  |
| 7674.756856 | 72.737793  |
| 7802.812461 | 95.714462  |
| 7957.953529 | 20.279022  |
| 7958.910391 | 39.225113  |
| 8300.138326 | 38.024899  |
| 8920.537835 | 76.851967  |
| 9403.800164 | 28.561422  |
| 9474.802177 | 19.241764  |
| 9499.780773 | 18.0856    |
| 9517.797112 | 67.534676  |
| 9518.755219 | 8.769422   |
| 9761.926966 | 21.262594  |
| 10062.13683 | 33.259583  |
| 10130.15554 | 12.300148  |
| 10177.17797 | 61.454865  |
| 12770.52673 | 22.487932  |
| 13309.80777 | 32.611935  |
| 14219.2082  | 82.166939  |
| 14232.26255 | 27.123806  |
| 14236.27415 | 28.955776  |
| 14243.17708 | 12.055311  |
| 14245.209   | 89.266495  |
| 14250.22897 | 18.891823  |
| 14257.24927 | 17.632208  |
| 14258.22388 | 22.183731  |
| 14260.32112 | 67.715034  |
| 14263.32982 | 157.711212 |
| 14273.17581 | 16.185795  |
| 14277.20831 | 159.98439  |
| 14286.25318 | 16.323587  |

|             |            |
|-------------|------------|
| 14289.17942 | 124.56311  |
| 14302.18718 | 65.194199  |
| 14305.1722  | 171.472992 |
| 14307.26588 | 36.423809  |
| 14316.18035 | 18.874645  |
| 14321.26629 | 508.790039 |
| 14334.21126 | 45.706882  |
| 15653.12558 | 24.621447  |

ProSight output for ECD of unmodified Cystatin SN sequence

User Specified Sequence

WSPKEEDRIIPGGIYNADLNDEWVQRALHFAISEYNKATKDDYRRPLRV  
TKSQPNLDT[-1.007825]CAFHEQPELQKKQL[-1.007825]CSFEIYE'

Number of Amino Acids: 121

Theoretical Mass: 14303.1 Da

Mass Difference: 15.9108 Da

C Ions: 7    Z Ions: 3

| Ion | Observed Mass (Da) | Theoretical Mass (Da) | Mass Error (Da) | Mass Error (PPM) | Delta M |
|-----|--------------------|-----------------------|-----------------|------------------|---------|
| C3  | 387.192            | 387.19                | 0.001           | 3.2              | --      |
| C4  | 515.287            | 515.285               | 0.002           | 3                | --      |
| C5  | 644.33             | 644.328               | 0.002           | 3.7              | --      |
| C7  | 888.402            | 888.398               | 0.005           | 5.2              | --      |
| C8  | 1044.51            | 1044.5                | 0.006           | 6                | --      |
| C9  | 1157.59            | 1157.58               | 0.007           | 6.3              | --      |
| C10 | 1270.68            | 1270.67               | 0.01            | 8                | --      |
| Z14 | 1673.82            | 1673.83               | -0.01           | -5.9             | --      |
| Z19 | 2348.15            | 2348.13               | 0.014           | 6                | --      |
| Z37 | 4503.22            | 4503.2                | 0.019           | 4.2              | --      |

Crude PScore: 1.45213e-05

McLucky Score: 6.39535

# ProSight output for ECD of modified Cystatin SN sequence

User Specified Sequence  
 WSPKEEDRIILGGIYNADLNDEWVQRALHFAISEYNKATKDDYYRRLRVLRLARQQTVGGVNYFFDVEVGRTI[-1.007825]  
 TKSQPNLDT[-1.007825]CAFHEQPELQKKQL[-1.007825]CSFEIYVWPWENRRSLVKSRLVKS[-1.007825]CQES  
 Number of Amino Acids: 121  
 Theoretical Mass: 14319.1 Da  
 Mass Difference: -0.12051 Da  
 C Ions: 34 Z Ions: 3

| Ion | Observed Mass (Da) | Theoretical Mass (Da) | Mass Error (Da) | Mass Error (PPM) | Delta M |
|-----|--------------------|-----------------------|-----------------|------------------|---------|
| C3  | 387.192            | 387.19                | 0.001           | 3.2              | --      |
| C4  | 515.287            | 515.285               | 0.002           | 3                | --      |
| C5  | 644.33             | 644.328               | 0.002           | 3.7              | --      |
| C7  | 888.402            | 888.398               | 0.005           | 5.2              | --      |
| C8  | 1044.51            | 1044.5                | 0.006           | 6                | --      |
| C9  | 1157.59            | 1157.58               | 0.007           | 6.3              | --      |
| C10 | 1270.68            | 1270.67               | 0.01            | 8                | --      |
| C11 | 1383.76            | 1383.75               | 0.008           | 5.7              | --      |
| C12 | 1440.78            | 1440.77               | 0.006           | 3.8              | --      |
| C14 | 1610.89            | 1610.88               | 0.012           | 7.5              | --      |
| C15 | 1773.95            | 1773.94               | 0.009           | 4.9              | --      |
| C16 | 1887.99            | 1887.98               | 0.01            | 5.1              | --      |
| C17 | 1959.03            | 1959.02               | 0.011           | 5.4              | --      |
| C19 | 2187.14            | 2187.13               | 0.012           | 5.6              | --      |
| C20 | 2301.19            | 2301.18               | 0.015           | 6.6              | --      |
| C21 | 2416.21            | 2416.2                | 0.011           | 4.4              | --      |
| C22 | 2545.26            | 2545.25               | 0.018           | 7                | --      |
| C32 | 3766.95            | 3766.92               | 0.029           | 7.7              | --      |
| C33 | 3853.99            | 3853.95               | 0.032           | 8.3              | --      |
| C35 | 4146.08            | 4146.06               | 0.024           | 5.9              | --      |
| C36 | 4260.14            | 4260.1                | 0.041           | 9.7              | --      |
| C37 | 4388.22            | 4388.2                | 0.023           | 5.2              | --      |
| C40 | 4688.42            | 4688.38               | 0.039           | 8.3              | --      |
| C41 | 4803.42            | 4803.4                | 0.01            | 2.2              | --      |
| C45 | 5400.69            | 5400.66               | 0.029           | 5.3              | --      |
| C47 | 5653.87            | 5653.81               | 0.052           | 9.2              | --      |
| C48 | 5766.92            | 5766.9                | 0.024           | 4.2              | --      |
| C49 | 5923.03            | 5923                  | 0.035           | 5.9              | --      |
| C50 | 6022.11            | 6022.07               | 0.041           | 6.8              | --      |
| C54 | 6518.43            | 6518.39               | 0.042           | 6.4              | --      |
| C56 | 6774.55            | 6774.51               | 0.043           | 6.4              | --      |
| C61 | 7187.76            | 7187.73               | 0.029           | 4                | --      |
| C62 | 7301.83            | 7301.78               | 0.051           | 7.1              | --      |
| C64 | 7611.95            | 7611.91               | 0.044           | 5.8              | --      |
| Z14 | 1673.82            | 1673.83               | -0.01           | -5.9             | --      |
| Z19 | 2348.15            | 2348.13               | 0.014           | 6                | --      |
| Z37 | 4503.22            | 4503.2                | 0.019           | 4.2              | --      |

Crude PScore: 2.05845e-35  
 McLuckey Score: 17.4419

## Graphic Fragment Mapper

W S P K E E D R I I L G G I Y N A D L N D E W V Q R A L H F  
 A I S E Y N K A T K D D Y Y R R P L R V L R A R Q Q T V G G  
 V N Y F F D V E V G R T I T K S Q P N L D T A F H E Q P  
 E L Q K K Q L S F E I Y E V P W E N R R S L V K S R Q E  
 S



# ProSight output for ECD of modified Cystatin SN sequence with disulfides reduced

User Specified Sequence -no disulfides  
 WSPKEEDRIILGGIYNADLNDEWVQRALHFAISEYNKATKDDYYRRPLRVLRARQQTVGGVNYFFDVEVGRITCKSQPNLDT  
 FHEQPQLKKQLCSFEIYVWPENRRSLVKSRQES  
 Number of Amino Acids: 121  
 Theoretical Mass: 14323.2 Da  
 Mass Difference: -4.15181 Da  
 C Ions: 35 Z Ions: 4

| Ion | Observed Mass (Da) | Theoretical Mass (Da) | Mass Error (Da) | Mass Error (PPM) | Delta M |
|-----|--------------------|-----------------------|-----------------|------------------|---------|
| C3  | 387.192            | 387.19                | 0.001           | 3.2              | --      |
| C4  | 515.287            | 515.285               | 0.002           | 3                | --      |
| C5  | 644.33             | 644.328               | 0.002           | 3.7              | --      |
| C7  | 888.402            | 888.398               | 0.005           | 5.2              | --      |
| C8  | 1044.51            | 1044.5                | 0.006           | 6                | --      |
| C9  | 1157.59            | 1157.58               | 0.007           | 6.3              | --      |
| C10 | 1270.68            | 1270.67               | 0.01            | 8                | --      |
| C11 | 1383.76            | 1383.75               | 0.008           | 5.7              | --      |
| C12 | 1440.78            | 1440.77               | 0.006           | 3.8              | --      |
| C14 | 1610.89            | 1610.88               | 0.012           | 7.5              | --      |
| C15 | 1773.95            | 1773.94               | 0.009           | 4.9              | --      |
| C16 | 1887.99            | 1887.98               | 0.01            | 5.1              | --      |
| C17 | 1959.03            | 1959.02               | 0.011           | 5.4              | --      |
| C19 | 2187.14            | 2187.13               | 0.012           | 5.6              | --      |
| C20 | 2301.19            | 2301.18               | 0.015           | 6.6              | --      |
| C21 | 2416.21            | 2416.2                | 0.011           | 4.4              | --      |
| C22 | 2545.26            | 2545.25               | 0.018           | 7                | --      |
| C32 | 3766.95            | 3766.92               | 0.029           | 7.7              | --      |
| C33 | 3853.99            | 3853.95               | 0.032           | 8.3              | --      |
| C35 | 4146.08            | 4146.06               | 0.024           | 5.9              | --      |
| C36 | 4260.14            | 4260.1                | 0.041           | 9.7              | --      |
| C37 | 4388.22            | 4388.2                | 0.023           | 5.2              | --      |
| C40 | 4688.42            | 4688.38               | 0.039           | 8.3              | --      |
| C41 | 4803.42            | 4803.4                | 0.01            | 2.2              | --      |
| C45 | 5400.69            | 5400.66               | 0.029           | 5.3              | --      |
| C47 | 5653.87            | 5653.81               | 0.052           | 9.2              | --      |
| C48 | 5766.92            | 5766.9                | 0.024           | 4.2              | --      |
| C49 | 5923.03            | 5923                  | 0.035           | 5.9              | --      |
| C50 | 6022.11            | 6022.07               | 0.041           | 6.8              | --      |
| C54 | 6518.43            | 6518.39               | 0.042           | 6.4              | --      |
| C56 | 6774.55            | 6774.51               | 0.043           | 6.4              | --      |
| C61 | 7187.76            | 7187.73               | 0.029           | 4                | --      |
| C62 | 7301.83            | 7301.78               | 0.051           | 7.1              | --      |
| C64 | 7611.95            | 7611.91               | 0.044           | 5.8              | --      |
| C81 | 9499.78            | 9499.86               | -0.08           | -8.4             | --      |
| Z10 | 1119.55            | 1119.55               | -0.002          | -1.7             | --      |
| Z14 | 1674.84            | 1674.84               | 0.007           | 3.9              | --      |
| Z17 | 2057.05            | 2057.04               | 0.012           | 5.7              | --      |
| Z34 | 4150.09            | 4150.05               | 0.038           | 9.1              | --      |

Crude PScore: 4.37773e-38  
 McLuckey Score: 18.314

## Graphical Fragment Mapper

W S P K E E D R I I L G G I Y N A D L N D E W V Q R A L H F  
 A I S E Y N K A T K D D Y Y R R P L R V L R A R Q Q T V G G  
 V N Y F F D V E V G R T I C T K S Q P N L D T C A F H E Q P  
 E L Q K K Q L C S F E I Y E V P W E N R R S L V K S R C Q E  
 S

Test of CH4 modification

User Specified Sequence

WSPKEEDRIIIGGIYNADLNDEWVQRALHFAISEYNKATKDDYYRRPLRVLRARQQ

TKSQPNLDT[-1.007825]CAFHEQPQLQKKQL[-1.007825]CSFEIYVWPWENRRSLV

Number of Amino Acids: 121

Theoretical Mass: 14319.1 Da

Mass Difference: 0.05049 Da

C Ions: 37 Z Ions: 5

| Ion | Observed M | Theoretical Mass | Mass Error | Mass Error Delta M |        |
|-----|------------|------------------|------------|--------------------|--------|
| C3  | 387.192    | 387.19           | 0.001      | 3.2 --             | 10.24  |
| C4  | 515.287    | 515.285          | 0.002      | 3 --               | 9      |
| C5  | 644.33     | 644.328          | 0.002      | 3.7 --             | 13.69  |
| C6  | 773.38     | 773.371          | 0.009      | 11.6 --            | 134.56 |
| C7  | 888.402    | 888.398          | 0.005      | 5.2 --             | 27.04  |
| C8  | 1044.505   | 1044.499         | 0.006      | 6 --               | 36     |
| C9  | 1157.59    | 1157.583         | 0.007      | 6.3 --             | 39.69  |
| C10 | 1270.677   | 1270.667         | 0.01       | 8 --               | 64     |
| C11 | 1383.759   | 1383.751         | 0.008      | 5.7 --             | 32.49  |
| C12 | 1440.778   | 1440.772         | 0.006      | 3.8 --             | 14.44  |
| C14 | 1610.89    | 1610.878         | 0.012      | 7.5 --             | 56.25  |
| C15 | 1773.95    | 1773.941         | 0.009      | 4.9 --             | 24.01  |
| C16 | 1887.994   | 1887.984         | 0.01       | 5.1 --             | 26.01  |
| C17 | 1959.032   | 1959.021         | 0.011      | 5.4 --             | 29.16  |
| C19 | 2187.144   | 2187.132         | 0.012      | 5.6 --             | 31.36  |
| C20 | 2301.19    | 2301.175         | 0.015      | 6.6 --             | 43.56  |
| C21 | 2416.213   | 2416.202         | 0.011      | 4.4 --             | 19.36  |
| C22 | 2545.263   | 2545.245         | 0.018      | 7 --               | 49     |
| C29 | 3435.776   | 3435.732         | 0.044      | 12.9 --            | 166.41 |
| C32 | 3766.951   | 3766.922         | 0.029      | 7.7 --             | 59.29  |
| C33 | 3853.986   | 3853.954         | 0.032      | 8.3 --             | 68.89  |
| C35 | 4146.084   | 4146.06          | 0.024      | 5.9 --             | 34.81  |
| C36 | 4260.144   | 4260.103         | 0.041      | 9.7 --             | 94.09  |
| C37 | 4388.22    | 4388.198         | 0.023      | 5.2 --             | 27.04  |
| C40 | 4688.416   | 4688.377         | 0.039      | 8.3 --             | 68.89  |
| C41 | 4803.415   | 4803.404         | 0.01       | 2.2 --             | 4.84   |
| C42 | 4918.483   | 4918.431         | 0.052      | 10.6 --            | 112.36 |
| C45 | 5400.688   | 5400.659         | 0.029      | 5.3 --             | 28.09  |
| C47 | 5653.865   | 5653.813         | 0.052      | 9.2 --             | 84.64  |
| C48 | 5766.921   | 5766.897         | 0.024      | 4.2 --             | 17.64  |
| C49 | 5923.033   | 5922.998         | 0.035      | 5.9 --             | 34.81  |
| C50 | 6022.108   | 6022.066         | 0.041      | 6.8 --             | 46.24  |
| C54 | 6518.431   | 6518.39          | 0.042      | 6.4 --             | 40.96  |
| C56 | 6774.55    | 6774.507         | 0.043      | 6.4 --             | 40.96  |
| C61 | 7187.763   | 7187.734         | 0.029      | 4 --               | 16     |
| C62 | 7301.829   | 7301.777         | 0.051      | 7.1 --             | 50.41  |
| C64 | 7611.953   | 7611.909         | 0.044      | 5.8 --             | 33.64  |
| Z14 | 1673.817   | 1673.827         | -0.01      | -5.9 --            | 34.81  |
| Z19 | 2348.147   | 2348.133         | 0.014      | 6 --               | 36     |
| Z33 | 4019.033   | 4018.991         | 0.043      | 10.6 --            | 112.36 |
| Z37 | 4503.217   | 4503.198         | 0.019      | 4.2 --             | 17.64  |
| Z68 | 7957.954   | 7957.838         | 0.116      | 14.6 --            | 213.16 |

Crude PScore: 3.6418e-35

50.09143

McLucky Score: 20.6395

RMS=

7.07753

Test of O modification

User Specified Sequence

WSPKEEDRII[15.994915]PGGIYNADLNDEWVQRALHFAISEYNKATKDDYYRRPI  
-1.007825]CTKSQPNLDT[-1.007825]CAFHEQPELQKKQL[-1.007825]CSFEIYEVF  
5]CQES

Number of Amino Acids: 121

Theoretical Mass: 14319.1 Da

Mass Difference: 0.086875 Da

C Ions: 21 Z Ions: 5

| Ion            | Observed M  | Theoretical Mass | Mass Error | Mass Error | Delta M  |
|----------------|-------------|------------------|------------|------------|----------|
| C3             | 387.192     | 387.19           | 0.001      | 3.2 --     | 10.24    |
| C4             | 515.287     | 515.285          | 0.002      | 3 --       | 9        |
| C5             | 644.33      | 644.328          | 0.002      | 3.7 --     | 13.69    |
| C6             | 773.38      | 773.371          | 0.009      | 11.6 --    | 134.56   |
| C7             | 888.402     | 888.398          | 0.005      | 5.2 --     | 27.04    |
| C8             | 1044.505    | 1044.499         | 0.006      | 6 --       | 36       |
| C9             | 1157.59     | 1157.583         | 0.007      | 6.3 --     | 39.69    |
| C10            | 1270.677    | 1270.667         | 0.01       | 8 --       | 64       |
| C13            | 1497.745    | 1497.757         | -0.013     | -8.6 --    | 73.96    |
| C35            | 4146.084    | 4146.023         | 0.061      | 14.7 --    | 216.09   |
| C37            | 4388.22     | 4388.161         | 0.059      | 13.5 --    | 182.25   |
| C41            | 4803.415    | 4803.368         | 0.047      | 9.8 --     | 96.04    |
| C45            | 5400.688    | 5400.623         | 0.065      | 12.1 --    | 146.41   |
| C48            | 5766.921    | 5766.86          | 0.061      | 10.6 --    | 112.36   |
| C49            | 5923.033    | 5922.962         | 0.071      | 12.1 --    | 146.41   |
| C50            | 6022.108    | 6022.03          | 0.078      | 12.9 --    | 166.41   |
| C54            | 6518.431    | 6518.353         | 0.078      | 12 --      | 144      |
| C56            | 6774.55     | 6774.471         | 0.08       | 11.8 --    | 139.24   |
| C61            | 7187.763    | 7187.698         | 0.065      | 9 --       | 81       |
| C62            | 7301.829    | 7301.741         | 0.088      | 12 --      | 144      |
| C64            | 7611.953    | 7611.873         | 0.08       | 10.5 --    | 110.25   |
| Z14            | 1673.817    | 1673.827         | -0.01      | -5.9 --    | 34.81    |
| Z19            | 2348.147    | 2348.133         | 0.014      | 6 --       | 36       |
| Z33            | 4019.033    | 4018.991         | 0.043      | 10.6 --    | 112.36   |
| Z37            | 4503.217    | 4503.198         | 0.019      | 4.2 --     | 17.64    |
| Z68            | 7957.954    | 7957.838         | 0.116      | 14.6 --    | 213.16   |
| Crude PScore:  | 1.98365e-17 |                  |            |            | 96.40808 |
| McLucky Score: | 13.6628     |                  |            | RMS=       | 9.818761 |

Test of NH2 modification

User Specified Sequence

WSPKEEDRII[16.01872]PGGIYNADLNDEWVQRALHFAISEYNKATKDDYYRRPLF  
 1.007825]CTKSQPNLDT[-1.007825]CAFHEQPELQKKQL[-1.007825]CSFEIYEVPI  
 ]CQES

Number of Amino Acids: 121

Theoretical Mass: 14319.1 Da

Mass Difference: 0.06307 Da

C Ions: 35 Z Ions: 5

| Ion | Observed M | Theoretical | Mass Error | Mass Error | Delta M |
|-----|------------|-------------|------------|------------|---------|
| C3  | 387.192    | 387.19      | 0.001      | 3.2 --     | 10.24   |
| C4  | 515.287    | 515.285     | 0.002      | 3 --       | 9       |
| C5  | 644.33     | 644.328     | 0.002      | 3.7 --     | 13.69   |
| C6  | 773.38     | 773.371     | 0.009      | 11.6 --    | 134.56  |
| C7  | 888.402    | 888.398     | 0.005      | 5.2 --     | 27.04   |
| C8  | 1044.505   | 1044.499    | 0.006      | 6 --       | 36      |
| C9  | 1157.59    | 1157.583    | 0.007      | 6.3 --     | 39.69   |
| C10 | 1270.677   | 1270.667    | 0.01       | 8 --       | 64      |
| C11 | 1383.759   | 1383.738    | 0.02       | 14.8 --    | 219.04  |
| C12 | 1440.778   | 1440.76     | 0.018      | 12.6 --    | 158.76  |
| C15 | 1773.95    | 1773.929    | 0.021      | 12 --      | 144     |
| C16 | 1887.994   | 1887.971    | 0.022      | 11.7 --    | 136.89  |
| C17 | 1959.032   | 1959.009    | 0.023      | 11.8 --    | 139.24  |
| C19 | 2187.144   | 2187.12     | 0.025      | 11.3 --    | 127.69  |
| C20 | 2301.19    | 2301.163    | 0.028      | 12.1 --    | 146.41  |
| C21 | 2416.213   | 2416.189    | 0.023      | 9.6 --     | 92.16   |
| C22 | 2545.263   | 2545.232    | 0.03       | 12 --      | 144     |
| C32 | 3766.951   | 3766.909    | 0.042      | 11.1 --    | 123.21  |
| C33 | 3853.986   | 3853.941    | 0.045      | 11.6 --    | 134.56  |
| C35 | 4146.084   | 4146.047    | 0.037      | 8.9 --     | 79.21   |
| C36 | 4260.144   | 4260.09     | 0.054      | 12.7 --    | 161.29  |
| C37 | 4388.22    | 4388.185    | 0.035      | 8.1 --     | 65.61   |
| C40 | 4688.416   | 4688.365    | 0.052      | 11 --      | 121     |
| C41 | 4803.415   | 4803.392    | 0.023      | 4.8 --     | 23.04   |
| C42 | 4918.483   | 4918.419    | 0.065      | 13.1 --    | 171.61  |
| C45 | 5400.688   | 5400.646    | 0.041      | 7.7 --     | 59.29   |
| C47 | 5653.865   | 5653.8      | 0.064      | 11.4 --    | 129.96  |
| C48 | 5766.921   | 5766.884    | 0.037      | 6.4 --     | 40.96   |
| C49 | 5923.033   | 5922.985    | 0.048      | 8.1 --     | 65.61   |
| C50 | 6022.108   | 6022.054    | 0.054      | 8.9 --     | 79.21   |
| C54 | 6518.431   | 6518.377    | 0.054      | 8.3 --     | 68.89   |
| C56 | 6774.55    | 6774.494    | 0.056      | 8.2 --     | 67.24   |
| C61 | 7187.763   | 7187.722    | 0.041      | 5.7 --     | 32.49   |
| C62 | 7301.829   | 7301.765    | 0.064      | 8.8 --     | 77.44   |
| C64 | 7611.953   | 7611.896    | 0.056      | 7.4 --     | 54.76   |
| Z14 | 1673.817   | 1673.827    | -0.01      | -5.9 --    | 34.81   |
| Z19 | 2348.147   | 2348.133    | 0.014      | 6 --       | 36      |
| Z33 | 4019.033   | 4018.991    | 0.043      | 10.6 --    | 112.36  |
| Z37 | 4503.217   | 4503.198    | 0.019      | 4.2 --     | 17.64   |
| Z68 | 7957.954   | 7957.838    | 0.116      | 14.6 --    | 213.16  |

Crude PScore: 8.84323e-33

90.294

McLucky Score: 21.2209

RMS=

9.502316

# Prosight output for PRP3, CAD, D4N

User Specified Sequence

[-17.0265]QDLNEDV[79.96633]SQEDVPLVISDGGD[79.96633]SEQFIDEERQGPPGGQSQPSAGDGNQDDGPPQ  
 GPPQGGQQGPPPPQKPKQGGHPPPPQGRPPQGGHPPPP

Number of Amino Acids: 105

Theoretical Mass: 10999 Da

Mass Difference: 0.0314 Da

B Ions: 9 Y Ions: 25

| Ion  | Observed Mass (Da) | Theoretical Mass (Da) | Mass Error (Da) | Mass Error (PPM) | Delta M |
|------|--------------------|-----------------------|-----------------|------------------|---------|
| B5   | 582.228            | 582.229               | 0               | -0.7             | --      |
| B11  | 1335.45            | 1335.45               | -0.005          | -3.9             | --      |
| B12  | 1434.52            | 1434.52               | -0.004          | -2.5             | --      |
| B15  | 1743.72            | 1743.72               | 0               | -0.1             | --      |
| B16  | 1856.81            | 1856.81               | 0.003           | 1.6              | --      |
| B19  | 2115.89            | 2115.89               | -0.001          | -0.7             | --      |
| B41  | 4578.91            | 4578.92               | -0.009          | -2               | --      |
| B56  | 6002.45            | 6002.48               | -0.036          | -6               | --      |
| B66  | 7078.95            | 7078.98               | -0.029          | -4.1             | --      |
| Y21  | 2178.12            | 2178.12               | -0.006          | -2.6             | --      |
| Y31  | 3161.58            | 3161.58               | 0.001           | 0.3              | --      |
| Y37  | 3765.91            | 3765.91               | -0.005          | -1.3             | --      |
| Y38  | 3862.96            | 3862.97               | -0.004          | -1               | --      |
| Y39  | 3919.98            | 3919.99               | -0.004          | -1.1             | --      |
| Y40  | 4048.04            | 4048.05               | -0.003          | -0.6             | --      |
| Y41  | 4176.1             | 4176.1                | -0.002          | -0.4             | --      |
| Y42  | 4304.16            | 4304.16               | -0.005          | -1.2             | --      |
| Y45  | 4546.25            | 4546.26               | -0.014          | -3.2             | --      |
| Y46  | 4674.32            | 4674.32               | -0.002          | -0.4             | --      |
| Y48  | 4899.43            | 4899.43               | 0               | 0                | --      |
| Y49  | 4996.48            | 4996.49               | -0.005          | -0.9             | --      |
| Y50  | 5053.5             | 5053.51               | -0.005          | -0.9             | --      |
| Y51  | 5181.56            | 5181.57               | -0.007          | -1.4             | --      |
| Y53  | 5406.67            | 5406.68               | -0.003          | -0.6             | --      |
| Y54  | 5463.69            | 5463.7                | -0.013          | -2.4             | --      |
| Y55  | 5578.71            | 5578.73               | -0.012          | -2.1             | --      |
| Y56  | 5693.75            | 5693.75               | -0.003          | -0.5             | --      |
| Y61  | 6164.95            | 6164.92               | 0.026           | 4.2              | --      |
| Y64  | 6420.05            | 6420.05               | 0.006           | 0.9              | --      |
| Y65  | 6548.11            | 6548.11               | 0               | 0                | --      |
| Y66  | 6635.14            | 6635.14               | 0.004           | 0.6              | --      |
| Y93  | 9564.43            | 9564.45               | -0.018          | -1.9             | --      |
| Y98  | 10202.6            | 10202.6               | -0.037          | -3.6             | --      |
| Y100 | 10416.7            | 10416.7               | -0.038          | -3.6             | --      |

|      |       |
|------|-------|
| -0.7 | 0.49  |
| -3.9 | 15.21 |
| -2.5 | 6.25  |
| -0.1 | 0.01  |
| 1.6  | 2.56  |
| -0.7 | 0.49  |
| -2   | 4     |
| -6   | 36    |
| -4.1 | 16.81 |
| -2.6 | 6.76  |
| 0.3  | 0.09  |
| -1.3 | 1.69  |
| -1   | 1     |
| -1.1 | 1.21  |
| -0.6 | 0.36  |
| -0.4 | 0.16  |
| -1.2 | 1.44  |
| -3.2 | 10.24 |
| -0.4 | 0.16  |
| 0    | 0     |
| -0.9 | 0.81  |
| -0.9 | 0.81  |
| -1.4 | 1.96  |
| -0.6 | 0.36  |
| -2.4 | 5.76  |
| -2.1 | 4.41  |
| -0.5 | 0.25  |
| 4.2  | 17.64 |
| 0.9  | 0.81  |
| 0    | 0     |
| 0.6  | 0.36  |
| -1.9 | 3.61  |
| -3.6 | 12.96 |
| -3.6 | 12.96 |

Crude PScore: 2.33315e-44

McLucky Score: 78.125

RMS

4.930294

2.220427

## Graphical Fragment Mapper

Q D L N E D V S Q E D V P L V I S D G G D S E Q F I D E E R  
 Q G P P L G G Q S Q P S A G D G N Q D D G P Q Q G P P Q Q  
G G Q Q Q G P P P P Q G K P Q G P P Q Q G G H P P P Q G  
 R P Q G P P Q Q G G H P R P P

# Prosight output for PRP3, ECD, WT

User Specified Sequence

[-17.0265]QDLDEDV[79.96633]SQEDVPLVISDGGD[79.96633]SEQFIDEERQGPLGGQSQPSAGDGNQDDGPPQ  
GPPQGGGQQQGGPPQGGKQGGPPQGGHPPPPQGRPPQGGHPPPP

Number of Amino Acids: 105

Theoretical Mass: 11000 Da

Mass Difference: -0.95261 Da

C Ions: 18 Z Ions: 24

| Ion | Observed Mass (Da) | Theoretical Mass (Da) | Mass Error (Da) | Mass Error (PPM) | Delta M |
|-----|--------------------|-----------------------|-----------------|------------------|---------|
| C3  | 356.169            | 356.169               | 0               | 0                | --      |
| C5  | 600.239            | 600.239               | 0               | 0                | --      |
| C6  | 715.266            | 715.266               | 0               | -0.5             | --      |
| C7  | 814.332            | 814.334               | -0.002          | -2.7             | --      |
| C8  | 981.329            | 981.333               | -0.004          | -3.7             | --      |
| C9  | 1109.39            | 1109.39               | -0.001          | -1.2             | --      |
| C10 | 1238.44            | 1238.43               | 0.005           | 3.9              | --      |
| C14 | 1662.67            | 1662.67               | 0.001           | 0.6              | --      |
| C15 | 1761.74            | 1761.73               | 0.003           | 1.7              | --      |
| C17 | 1961.85            | 1961.85               | 0               | -0.2             | --      |
| C22 | 2472.95            | 2472.95               | 0.008           | 3.1              | --      |
| C23 | 2601.99            | 2601.99               | 0.004           | 1.6              | --      |
| C31 | 3647.49            | 3647.47               | 0.016           | 4.4              | --      |
| C35 | 4011.71            | 4011.68               | 0.023           | 5.7              | --      |
| C38 | 4253.79            | 4253.78               | 0.004           | 0.9              | --      |
| C44 | 4852.09            | 4852.06               | 0.036           | 7.5              | --      |
| C49 | 5323.17            | 5323.23               | -0.054          | -10.2            | --      |
| C50 | 5438.28            | 5438.25               | 0.029           | 5.3              | --      |
| Z3  | 352.198            | 352.198               | 0               | -0.5             | --      |
| Z5  | 586.31             | 586.31                | 0               | -0.6             | --      |
| Z8  | 828.411            | 828.412               | -0.001          | -1               | --      |
| Z9  | 956.468            | 956.47                | -0.003          | -2.6             | --      |
| Z12 | 1207.6             | 1207.6                | 0.001           | 0.8              | --      |
| Z13 | 1335.66            | 1335.66               | 0.005           | 3.9              | --      |
| Z15 | 1588.81            | 1588.81               | -0.002          | -1.1             | --      |
| Z16 | 1645.83            | 1645.83               | 0               | 0.1              | --      |
| Z17 | 1773.89            | 1773.89               | -0.002          | -1.1             | --      |
| Z22 | 2299.16            | 2299.16               | 0.004           | 1.8              | --      |
| Z23 | 2356.18            | 2356.18               | -0.001          | -0.4             | --      |
| Z30 | 3048.47            | 3048.51               | -0.031          | -10.2            | --      |
| Z33 | 3330.66            | 3330.67               | -0.013          | -3.8             | --      |
| Z38 | 3846.93            | 3846.94               | -0.015          | -3.9             | --      |
| Z40 | 4032               | 4032.02               | -0.02           | -4.9             | --      |
| Z41 | 4160.09            | 4160.08               | 0.009           | 2.2              | --      |
| Z44 | 4473.23            | 4473.22               | 0.012           | 2.6              | --      |
| Z45 | 4530.26            | 4530.24               | 0.014           | 3.1              | --      |
| Z50 | 5037.48            | 5037.49               | -0.01           | -2               | --      |
| Z51 | 5165.55            | 5165.55               | 0.005           | 1                | --      |
| Z58 | 5919.83            | 5919.83               | -0.007          | -1.2             | --      |
| Z59 | 5976.86            | 5976.86               | 0.001           | 0.3              | --      |
| Z60 | 6091.86            | 6091.88               | -0.021          | -3.4             | --      |
| Z67 | 6747.18            | 6747.18               | 0.008           | 1.1              | --      |

|       |        |
|-------|--------|
| 0     | 0      |
| 0     | 0      |
| -0.5  | 0.25   |
| -2.7  | 7.29   |
| -3.7  | 13.69  |
| -1.2  | 1.44   |
| 3.9   | 15.21  |
| 0.6   | 0.36   |
| 1.7   | 2.89   |
| -0.2  | 0.04   |
| 3.1   | 9.61   |
| 1.6   | 2.56   |
| 4.4   | 19.36  |
| 5.7   | 32.49  |
| 0.9   | 0.81   |
| 7.5   | 56.25  |
| -10.2 | 104.04 |
| 5.3   | 28.09  |
| -0.5  | 0.25   |
| -0.6  | 0.36   |
| -1    | 1      |
| -2.6  | 6.76   |
| 0.8   | 0.64   |
| 3.9   | 15.21  |
| -1.1  | 1.21   |
| 0.1   | 0.01   |
| -1.1  | 1.21   |
| 1.8   | 3.24   |
| -0.4  | 0.16   |
| -10.2 | 104.04 |
| -3.8  | 14.44  |
| -3.9  | 15.21  |
| -4.9  | 24.01  |
| 2.2   | 4.84   |
| 2.6   | 6.76   |
| 3.1   | 9.61   |
| -2    | 4      |
| 1     | 1      |
| -1.2  | 1.44   |
| 0.3   | 0.09   |
| -3.4  | 11.56  |
| 1.1   | 1.21   |

Crude PScore: 1.2169e-32  
McLucky Score: 11.7308

RMS 3.527578

## Graphic Fragment Mapper

# Prosight output for PRP3, ECD, D4N

User Specified Sequence

[-17.0265]QDLDEDV[79.96633]SQEDVPLVISDGGD[79.96633]SEQFIDEERQGPPLGGQQSQPSAGDGNQDDGPPQQ  
GPPQQGGQQQGGPPPPQGGKPPQGGHPPPPQGRPQGGPPQQGGHPPPP

Number of Amino Acids: 105

Theoretical Mass: 11000 Da

Mass Difference: -0.95261 Da

C Ions: 18 Z Ions: 24

| Ion | Observed Mass (Da) | Theoretical Mass (Da) | Mass Error (Da) | Mass Error (PPM) | Delta M |
|-----|--------------------|-----------------------|-----------------|------------------|---------|
| C3  | 356.169            | 356.169               | 0               | 0                | --      |
| C5  | 600.239            | 600.239               | 0               | 0                | --      |
| C6  | 715.266            | 715.266               | 0               | -0.5             | --      |
| C7  | 814.332            | 814.334               | -0.002          | -2.7             | --      |
| C8  | 981.329            | 981.333               | -0.004          | -3.7             | --      |
| C9  | 1109.39            | 1109.39               | -0.001          | -1.2             | --      |
| C10 | 1238.44            | 1238.43               | 0.005           | 3.9              | --      |
| C14 | 1662.67            | 1662.67               | 0.001           | 0.6              | --      |
| C15 | 1761.74            | 1761.73               | 0.003           | 1.7              | --      |
| C17 | 1961.85            | 1961.85               | 0               | -0.2             | --      |
| C22 | 2472.95            | 2472.95               | 0.008           | 3.1              | --      |
| C23 | 2601.99            | 2601.99               | 0.004           | 1.6              | --      |
| C31 | 3647.49            | 3647.47               | 0.016           | 4.4              | --      |
| C35 | 4011.71            | 4011.68               | 0.023           | 5.7              | --      |
| C38 | 4253.79            | 4253.78               | 0.004           | 0.9              | --      |
| C44 | 4852.09            | 4852.06               | 0.036           | 7.5              | --      |
| C49 | 5323.17            | 5323.23               | -0.054          | -10.2            | --      |
| C50 | 5438.28            | 5438.25               | 0.029           | 5.3              | --      |
| Z3  | 352.198            | 352.198               | 0               | -0.5             | --      |
| Z5  | 586.31             | 586.31                | 0               | -0.6             | --      |
| Z8  | 828.411            | 828.412               | -0.001          | -1               | --      |
| Z9  | 956.468            | 956.47                | -0.003          | -2.6             | --      |
| Z12 | 1207.6             | 1207.6                | 0.001           | 0.8              | --      |
| Z13 | 1335.66            | 1335.66               | 0.005           | 3.9              | --      |
| Z15 | 1588.81            | 1588.81               | -0.002          | -1.1             | --      |
| Z16 | 1645.83            | 1645.83               | 0               | 0.1              | --      |
| Z17 | 1773.89            | 1773.89               | -0.002          | -1.1             | --      |
| Z22 | 2299.16            | 2299.16               | 0.004           | 1.8              | --      |
| Z23 | 2356.18            | 2356.18               | -0.001          | -0.4             | --      |
| Z30 | 3048.47            | 3048.51               | -0.031          | -10.2            | --      |
| Z33 | 3330.66            | 3330.67               | -0.013          | -3.8             | --      |
| Z38 | 3846.93            | 3846.94               | -0.015          | -3.9             | --      |
| Z40 | 4032               | 4032.02               | -0.02           | -4.9             | --      |
| Z41 | 4160.09            | 4160.08               | 0.009           | 2.2              | --      |
| Z44 | 4473.23            | 4473.22               | 0.012           | 2.6              | --      |
| Z45 | 4530.26            | 4530.24               | 0.014           | 3.1              | --      |
| Z50 | 5037.48            | 5037.49               | -0.01           | -2               | --      |
| Z51 | 5165.55            | 5165.55               | 0.005           | 1                | --      |
| Z58 | 5919.83            | 5919.83               | -0.007          | -1.2             | --      |
| Z59 | 5976.86            | 5976.86               | 0.001           | 0.3              | --      |
| Z60 | 6091.86            | 6091.88               | -0.021          | -3.4             | --      |
| Z67 | 6747.18            | 6747.18               | 0.008           | 1.1              | --      |

|       |        |
|-------|--------|
| 0     | 0      |
| 0     | 0      |
| -0.5  | 0.25   |
| -2.7  | 7.29   |
| -3.7  | 13.69  |
| -1.2  | 1.44   |
| 3.9   | 15.21  |
| 0.6   | 0.36   |
| 1.7   | 2.89   |
| -0.2  | 0.04   |
| 3.1   | 9.61   |
| 1.6   | 2.56   |
| 4.4   | 19.36  |
| 5.7   | 32.49  |
| 0.9   | 0.81   |
| 7.5   | 56.25  |
| -10.2 | 104.04 |
| 5.3   | 28.09  |
| -0.5  | 0.25   |
| -0.6  | 0.36   |
| -1    | 1      |
| -2.6  | 6.76   |
| 0.8   | 0.64   |
| 3.9   | 15.21  |
| -1.1  | 1.21   |
| 0.1   | 0.01   |
| -1.1  | 1.21   |
| 1.8   | 3.24   |
| -0.4  | 0.16   |
| -10.2 | 104.04 |
| -3.8  | 14.44  |
| -3.9  | 15.21  |
| -4.9  | 24.01  |
| 2.2   | 4.84   |
| 2.6   | 6.76   |
| 3.1   | 9.61   |
| -2    | 4      |
| 1     | 1      |
| -1.2  | 1.44   |
| 0.3   | 0.09   |
| -3.4  | 11.56  |
| 1.1   | 1.21   |

Crude PScore: 1.2169e-32

McLucky Score: 11.7308

RMS 12.44381 3.527578

## Graphical Fragment Mapper

Q D L D E D V S Q E D V P L V I S D G G D S E Q F I D E E R  
 Q G P P L G G Q Q S Q P S A G D G N Q D D G P Q Q G P P Q Q  
 G G Q Q Q G G P P P P Q G K P Q G P P Q Q G H P P P P Q G  
 R P Q G P P Q Q G G H P R P P
